# Supplementary material for: Patient and Care Partner Burden in CKD Patients With and Without Anemia: A US-Based Survey
Source: PubMed Central journal article supplement — Kidney Med. 2022 Mar 7;4(4):100439. doi: 10.1016/j.xkme.2022.100439 (PMC8988003; doi:10.1016/j.xkme.2022.100439), 2022-03-07
Supplement: mmc1.pdf [file mmc1.pdf]

**Item S1.** Patient survey

**Chronic Kidney Disease Patient Survey**

---

**PART I. PATIENT ELIGIBILITY**

---

**S1.** What is your age?

1. Under 18 years old [**Terminate**]
2. 18-34 years old
3. 35-44 years old
4. 45-54 years old
5. 55-64 years old
6. 65-74 years old
7. 75-84 years old
8. 85 years or older
9. Prefer not to answer [**Terminate**]

**S2.** What is your level of comfort in reading and understanding the English language?

1. Fluent / native language
2. English is not my native language; I am very comfortable reading and understanding English
3. English is not my native language; I am somewhat comfortable reading and understanding English
4. English is not my native language; I am not at all comfortable reading and understanding English [**Terminate**]

**S3.** What health conditions do you currently have, if any? *Please indicate all conditions you have been diagnosed with by a doctor.*

1. Anemia
  - 1.1. Anemia due to chronic kidney disease (CKD)
  - 1.2. Anemia due to cancer
  - 1.3. Anemia due to nutrient deficiency (e.g., iron deficiency, vitamin deficiency)
  - 1.4. Other type of anemia (e.g., hemolytic anemia, aplastic anemia, sickle cell anemia)
  - 1.5. Don't know/ Not sure
2. Cancer [**Terminate**]
3. Cerebrovascular disease (e.g., stroke, transient ischemic attack)
4. Chronic kidney disease (CKD) [**Terminate if not selected**]
5. Chronic respiratory disease (e.g., asthma, chronic lung disease, chronic bronchitis, emphysema)
6. Depression
7. Diabetes
8. Gout

9. Heart disease (e.g., cardiac arrhythmia, congestive heart failure, coronary artery disease, myocardial infarction, peripheral vascular disease [or bypass])
10. High cholesterol
11. Hyperkalemia (high potassium in blood)
12. Hypertension (high blood pressure)
13. Malnutrition
14. Thyroid problems (e.g., hypothyroidism, hyperthyroidism)
15. Other (please specify): \_\_\_\_\_
16. None

**S4.** You indicated that you have been diagnosed with chronic kidney disease (CKD). Are you currently undergoing dialysis, on a regular basis? *If so, please select the type of dialysis you are receiving below.*

1. Yes
  - 1.1. Hemodialysis (in-center)
  - 1.2. Hemodialysis (home)
  - 1.3. Peritoneal dialysis
  - 1.4. Don't know/ Not sure
2. No
3. Don't know/ Not sure [**Terminate**]

**S5.** Have you had a kidney transplant or are you on the waitlist for a first kidney transplant?

1. Yes, I have had at least one kidney transplant [**Terminate**]
2. Yes, I am on the waitlist to have a first kidney transplant
3. No
4. Don't know/ Not sure [**Terminate**]

|                                         |
|-----------------------------------------|
| <b>PART II. DISEASE CHARACTERISTICS</b> |
|-----------------------------------------|

**A1.** For how long have you been diagnosed with CKD? *Please enter the number of years since you were first told by a doctor that you had CKD.*

1. Less than a year
2. \_\_\_\_\_ year(s)
3. Don't know/ Not sure

**[ANEMIA PATIENTS ONLY]**

**A2.** For how long have you been diagnosed with anemia? *Please enter the number of years since you were first told by a doctor that you have anemia.*

1. Less than a year
2. \_\_\_\_\_ year(s)
3. Don't know/ Not sure

**A3.** Your doctor may have described your anemia as mild, moderate, or severe. If so, please indicate the severity level of your anemia.

1. Mild
2. Moderate
3. Severe
4. Don't know / Not sure

**A4.** Have you received any treatment(s) to manage your anemia? *Please indicate the treatment(s) you currently receive and any treatment(s) you may have received in the past. If you received more than one treatment, please select all that apply.*

|                                                                                 | <b>Current</b> anemia treatment(s)<br>(i.e., received within the last month) | <b>Former</b> anemia treatment(s)<br>(i.e., not received in the last month) |
|---------------------------------------------------------------------------------|------------------------------------------------------------------------------|-----------------------------------------------------------------------------|
| 1. Red blood cell transfusion                                                   |                                                                              |                                                                             |
| 2. Erythropoietin stimulating agents (ESAs; e.g., Procrit, Retacrit, Aranesp)   |                                                                              |                                                                             |
| 3. Intravenous iron supplement (e.g., Venofer, Feraheme, Ferrlecit, Injectafer) |                                                                              |                                                                             |
| 4. Oral iron supplement                                                         |                                                                              |                                                                             |
| 5. Vitamin B12 supplement                                                       |                                                                              |                                                                             |
| 6. Folic acid supplement                                                        |                                                                              |                                                                             |
| 7. Other vitamin supplement (please specify)                                    | _____                                                                        | _____                                                                       |
| 8. Dietary modification                                                         |                                                                              |                                                                             |
| 9. Other treatment (please specify)                                             | _____                                                                        | _____                                                                       |
| 10. None                                                                        |                                                                              |                                                                             |

**[ANEMIA PATIENTS WITH AT LEAST ONE CURRENT ANEMIA TREATMENT ONLY]**

**A5.** Do you feel your current anemia treatment is helping to improve your symptoms?

1. Yes
2. No
3. Don't know/ Not sure

**A6.** How satisfied are you with your current anemia treatment(s)?

1. I am extremely satisfied
2. I am satisfied
3. I am neither satisfied or dissatisfied
4. I am dissatisfied
5. I am extremely dissatisfied

**A7.** What are the main reason(s) why you are satisfied with your current anemia treatment(s)? *Please select all that apply.*

1. My symptoms have improved
2. I have had no (or only mild) adverse reactions/side effects to treatment
3. I feel my quality of life has improved
4. My other health conditions have improved since starting my anemia treatment
5. There have been no (or few) negative interactions with other medication(s) I am taking
6. My treatment is convenient to take
7. There are no or few monitoring requirements (e.g., regular lab tests) associated with my treatment
8. My treatment does not cost me a lot of money (i.e., low out-of-pocket costs)
9. Other (please specify):\_\_\_\_\_

**A8.** What are the main reason(s) why you are dissatisfied with your current anemia treatment(s)? *Please select all that apply.*

1. I have had mild adverse reactions/side effects to the treatment
2. I have had severe adverse reactions/side effects to the treatment
3. My treatment has not sufficiently improved my symptoms
4. I feel my quality of life has gotten worse
5. I have developed other health conditions as a result of treatment
6. Other existing health conditions have gotten worse as a result of treatment
7. My treatment has had negative interactions with other medication(s) I am taking
8. My treatment is inconvenient or burdensome for me to take
9. My treatment requires monitoring (e.g., regular lab tests) that is inconvenient or burdensome for me
10. My treatment is expensive for me (i.e., high out-of-pocket costs)
11. Other (please specify):\_\_\_\_\_

**A9.** Which type of erythropoietin stimulating agent (ESA) treatment are you currently receiving?

1. Injection at home
  - 1.1. Three times per week (e.g., Monday, Wednesday, Friday)
  - 1.2. Once weekly
  - 1.3. Once every other week
  - 1.4. Once monthly
  - 1.5. Don't know/ Not sure
2. Injection at a healthcare facility or dialysis center
  - 2.1. Three times per week (e.g., Monday, Wednesday, Friday)
  - 2.2. Once weekly
  - 2.3. Once every other week
  - 2.4. Once monthly
  - 2.5. Don't know/ Not sure

**A10.** On average, how long does it take you to get ESA treatment when administered at a healthcare facility or dialysis center, from the moment you leave your residence to the moment you return? *Please include all time for transportation, wait, and treatment at your healthcare provider.*

1. \_\_\_\_\_ hours \_\_\_\_\_ minutes
2. Don't know/ Not sure

**A11.** On average, how often does a family member or friend accompany you for your ESA treatment when administered at a healthcare facility or dialysis center? *Please select the answer that best describes your situation.*

1. Always (100% of the time)
2. Usually (~80% of the time)
3. Often (~60% of the time)
4. Sometimes (~40% of the time)
5. Rarely (<20% of the time)
6. Never (0% of the time)
7. Don't know/ Not sure

**A12.** On average, how long does it take you to administer your ESA treatment at home?

1. \_\_\_\_\_ minutes
2. Don't know/ Not sure

**A13.** On average, how often does a family member or friend assist you with your ESA treatment at home? *Please select the answer that best describes your situation.*

1. Always (100% of the time)
2. Usually (~80% of the time)
3. Often (~60% of the time)
4. Sometimes (~40% of the time)
5. Rarely (<20% of the time)

6. Never (0% of the time)

**A14.** If you were going to start a **new anemia treatment**, which type of treatment would you prefer, assuming the treatment works just as well?

1. Oral (e.g., pill)
  - 1.1. Twice daily
  - 1.2. Once daily
  - 1.3. Three times per week (e.g., Monday, Wednesday, Friday)
  - 1.4. No preference
2. Subcutaneous injection at home (i.e., injection under the skin)
  - 2.1. Three times per week (e.g., Monday, Wednesday, Friday)
  - 2.2. Once weekly
  - 2.3. Once every other week
  - 2.4. Once monthly
  - 2.5. No preference
3. Intravenous injection at a healthcare facility (i.e., injection into a vein)
  - 3.1. Three times per week (e.g., Monday, Wednesday, Friday)
  - 3.2. Once weekly
  - 3.3. Once every other week
  - 3.4. Once monthly
  - 3.5. No preference
4. Intravenous injection at a dialysis facility (i.e., injection into a vein)
  - 4.1. Three times per week (e.g., Monday, Wednesday, Friday)
  - 4.2. Once weekly
  - 4.3. Once every other week
  - 4.4. Once monthly
  - 4.5. No preference
5. I don't have a preference for a type of treatment
  - 5.1. Once daily
  - 5.2. Three times per week (e.g., Monday, Wednesday, Friday)
  - 5.3. Once weekly
  - 5.4. No preference

**[END OF ANEMIA QUESTIONS]**

|                                                 |
|-------------------------------------------------|
| <b>PART III. HEALTH-RELATED QUALITY OF LIFE</b> |
|-------------------------------------------------|

**B1.** Below is a list of statements that other people with your illness have said are important. Please select one number per line to indicate your response as it applies to the **past 7 days.**

|                                                                                                                                                         | <b>Not at all</b> | <b>A little bit</b> | <b>Somewhat</b> | <b>Quite a bit</b> | <b>Very much</b> |
|---------------------------------------------------------------------------------------------------------------------------------------------------------|-------------------|---------------------|-----------------|--------------------|------------------|
| <b><u>Physical well-being</u></b>                                                                                                                       |                   |                     |                 |                    |                  |
| 1. I have a lack of energy                                                                                                                              |                   |                     |                 |                    |                  |
| 2. I have nausea                                                                                                                                        |                   |                     |                 |                    |                  |
| 3. Because of my physical condition, I have trouble meeting the needs of my family                                                                      |                   |                     |                 |                    |                  |
| 4. I have pain                                                                                                                                          |                   |                     |                 |                    |                  |
| 5. I am bothered by the side effects of treatment                                                                                                       |                   |                     |                 |                    |                  |
| 6. I feel ill                                                                                                                                           |                   |                     |                 |                    |                  |
| 7. I am forced to spend time in bed                                                                                                                     |                   |                     |                 |                    |                  |
| <b><u>Social/family well-being</u></b>                                                                                                                  |                   |                     |                 |                    |                  |
| 8. I feel close to my friends                                                                                                                           |                   |                     |                 |                    |                  |
| 9. I get emotional support from my family                                                                                                               |                   |                     |                 |                    |                  |
| 10. I get support from my friends                                                                                                                       |                   |                     |                 |                    |                  |
| 11. My family has accepted my illness                                                                                                                   |                   |                     |                 |                    |                  |
| 12. I am satisfied with family communication about my illness                                                                                           |                   |                     |                 |                    |                  |
| 13. I feel close to my partner (or the person who is my main support)                                                                                   |                   |                     |                 |                    |                  |
| <i>Regardless of your current level of sexual activity please answer the following question. If you prefer not to answer it, please click this box.</i> |                   |                     |                 |                    |                  |
| 14. I am satisfied with my sex life                                                                                                                     |                   |                     |                 |                    |                  |

|                                                              | <b>Not at all</b> | <b>A little bit</b> | <b>Somewhat</b> | <b>Quite a bit</b> | <b>Very much</b> |
|--------------------------------------------------------------|-------------------|---------------------|-----------------|--------------------|------------------|
| <b><u>Emotional well-being</u></b>                           |                   |                     |                 |                    |                  |
| 15. I feel sad                                               |                   |                     |                 |                    |                  |
| 16. I am satisfied with how I am coping with my illness      |                   |                     |                 |                    |                  |
| 17. I am losing hope in the fight against my illness         |                   |                     |                 |                    |                  |
| 18. I feel nervous                                           |                   |                     |                 |                    |                  |
| 19. I worry about dying                                      |                   |                     |                 |                    |                  |
| 20. I worry that my condition will get worse                 |                   |                     |                 |                    |                  |
| <b><u>Functional well-being</u></b>                          |                   |                     |                 |                    |                  |
| 21. I am able to work (include work at home)                 |                   |                     |                 |                    |                  |
| 22. My work (include work at home) is fulfilling             |                   |                     |                 |                    |                  |
| 23. I am able to enjoy life                                  |                   |                     |                 |                    |                  |
| 24. I have accepted my illness                               |                   |                     |                 |                    |                  |
| 25. I am sleeping well                                       |                   |                     |                 |                    |                  |
| 26. I am enjoying the things I usually do for fun            |                   |                     |                 |                    |                  |
| 27. I am content with the quality of my life right now       |                   |                     |                 |                    |                  |
| <b><u>Additional concerns</u></b>                            |                   |                     |                 |                    |                  |
| 28. I feel fatigued                                          |                   |                     |                 |                    |                  |
| 29. I feel weak all over                                     |                   |                     |                 |                    |                  |
| 30. I feel listless ("washed out")                           |                   |                     |                 |                    |                  |
| 31. I feel tired                                             |                   |                     |                 |                    |                  |
| 32. I have trouble <u>starting</u> things because I am tired |                   |                     |                 |                    |                  |



|                                                                      | <b>Not at all</b> | <b>A little bit</b> | <b>Somewhat</b> | <b>Quite a bit</b> | <b>Very much</b> |
|----------------------------------------------------------------------|-------------------|---------------------|-----------------|--------------------|------------------|
| 33. I have trouble <u>finishing</u> things because I am tired        |                   |                     |                 |                    |                  |
| 34. I have energy                                                    |                   |                     |                 |                    |                  |
| 35. I have trouble walking                                           |                   |                     |                 |                    |                  |
| 36. I am able to do my usual activities                              |                   |                     |                 |                    |                  |
| 37. I need to sleep during the day                                   |                   |                     |                 |                    |                  |
| 38. I feel lightheaded (dizzy)                                       |                   |                     |                 |                    |                  |
| 39. I get headaches                                                  |                   |                     |                 |                    |                  |
| 40. I have been short of breath                                      |                   |                     |                 |                    |                  |
| 41. I have pain in my chest                                          |                   |                     |                 |                    |                  |
| 42. I am too tired to eat                                            |                   |                     |                 |                    |                  |
| 43. I am interested in sex                                           |                   |                     |                 |                    |                  |
| 44. I am motivated to do my usual activities                         |                   |                     |                 |                    |                  |
| 45. I need help doing my usual activities                            |                   |                     |                 |                    |                  |
| 46. I am frustrated by being too tired to do the things I want to do |                   |                     |                 |                    |                  |
| 47. I have to limit my social activity because I am tired            |                   |                     |                 |                    |                  |

**PART IV. CARE RECEIVED**

**C1.** During the past 4 weeks, have you received help or services from other people due to your health (e.g., help driving to medical visits, administering medical services in your home, performing chores or daily activities)? *If so, how many hours per week on average did you receive help or services? Please select all that apply.*

|  |                                                                          |
|--|--------------------------------------------------------------------------|
|  | <ul style="list-style-type: none"> <li>• <b>Help/services</b></li> </ul> |
|--|--------------------------------------------------------------------------|

|                                    |                  |
|------------------------------------|------------------|
| 1. Spouse or partner               | _____ hours/week |
| 2. Parent or step-parent           | _____ hours/week |
| 3. Sibling or step-sibling         | _____ hours/week |
| 4. Child or step-child             | _____ hours/week |
| 5. Aunt, uncle, or other relative  | _____ hours/week |
| 6. Friend or neighbor              | _____ hours/week |
| 7. Paid home care service or nurse | _____ hours/week |
| 8. Other (please specify): _____   | _____ hours/week |
| 9. Did not receive any help        |                  |

**C2.** During the **past 4 weeks**, how many people have you received help or services from due to your health (e.g., help driving to medical visits, administering medical services in your home, performing chores or daily activities)?

1. \_\_\_\_\_ people
2. Don't know/ Not sure

|                                                      |
|------------------------------------------------------|
| <b>PART V. EMPLOYMENT AND WORK PRODUCTIVITY LOSS</b> |
|------------------------------------------------------|

**D1.** Are you currently employed (working for pay)?

1. No
2. Yes

**The next questions are about the past 7 days, not including today.**

**D2.** During the **past 7 days**, how many hours did you miss from work because of your health problems? *Include hours you missed on sick days, times you went in late, left early, etc., because of your health problems. Do not include time you missed to participate in this study.*

1. \_\_\_\_\_ hours

**D3.** During the **past 7 days**, how many hours did you miss from work because of any other reason, such as vacation, holidays, time off to participate in this study?

1. \_\_\_\_\_ hours

**D4.** During the **past 7 days**, how many hours did you actually work?

1. \_\_\_\_\_hours

**D5.** During the **past 7 days**, how much did your health problems affect your productivity **while you were working**? *Think about days you were limited in the amount or kind of work you could do, days you accomplished less than you would like, or days you could not do your work as carefully as usual. If health problems affected your work only a little, choose a low number. Choose a high number if health problems affected your work a great deal.*

Consider only how much health problems affected  
productivity while you were working.

|                                                |                        |                                                            |
|------------------------------------------------|------------------------|------------------------------------------------------------|
| Health problems<br>had no effect on<br>my work | _____                  | Health problems<br>completely prevented<br>me from working |
|                                                | 0 1 2 3 4 5 6 7 8 9 10 |                                                            |

SELECT A NUMBER

**D6.** During the **past 7 days**, how much did your health problems affect your ability to do your regular daily activities, other than work at a job? *By regular activities, we mean the usual activities you do, such as work around the house, shopping, childcare, exercising, studying, etc. Think about times you were limited in the amount or kind of activities you could do and times you accomplished less than you would like. If health problems affected your activities only a little, choose a low number. Choose a high number if health problems affected your activities a great deal.*

Consider only how much health problems affected your ability  
to do your regular daily activities, other than work at a job.

|                                                            |                        |                                                                                    |
|------------------------------------------------------------|------------------------|------------------------------------------------------------------------------------|
| Health problems<br>had no effect on<br>my daily activities | _____                  | Health problems<br>completely<br>prevented me from<br>doing my daily<br>activities |
|                                                            | 0 1 2 3 4 5 6 7 8 9 10 |                                                                                    |

SELECT A NUMBER

**D7.** Has your CKD contributed to making any of the following job-related decisions? *Please select all that apply. If you have increased or decreased the number of hours you work, please indicate by how many hours per week you increased or decreased your workload.*

1. Quit job or employment
2. Retired earlier than planned
3. Changed jobs or employers
4. Declined a job advancement (transfer or promotion)
5. Decreased the number of hours you work per week
  - 5.1. Decreased by \_\_\_\_\_ hours/week
6. Increased the number of hours you work per week
  - 6.1. Increased by \_\_\_\_\_ hours/week
7. Changed the shift you work
8. Taken a leave of absence
9. None
10. Don't know/ Not sure
11. Prefer not to answer

|                                             |
|---------------------------------------------|
| <b>PART VI. DEMOGRAPHIC CHARACTERISTICS</b> |
|---------------------------------------------|

**E1.** What is your gender?

1. Male
2. Female
3. Prefer not to answer

**E2.** What is your ethnicity/race? *Please select all that apply.*

1. African American or Black
2. Asian or Pacific Islander
3. Native American or Alaskan Native
4. Hispanic or Latino
5. White
6. Other (please specify): \_\_\_\_\_
7. Prefer not to answer

**E3.** Please select your state of residence from the list below.

**Item S2.** Care-partner survey

**Chronic Kidney Disease Caregiver Survey**

**PART I. CAREGIVER ELIGIBILITY**

**S1.** What is your age?

1. Under 18 years old [**Terminate**]
2. 18-34 years old
3. 35-44 years old
4. 45-54 years old
5. 55-64 years old
6. 65-74 years old
7. 75-84 years old
8. 85 years or older
9. Prefer not to answer [**Terminate**]

**S2.** What is your level of comfort in reading and understanding the English language?

1. Fluent / native language
2. English is not my native language; I am very comfortable reading and understanding English
3. English is not my native language; I am somewhat comfortable reading and understanding English
4. English is not my native language; I am not at all comfortable reading and understanding English [**Terminate**]

**S3.** During the **past 4 weeks**, have you provided unpaid care or assistance to another adult who has chronic kidney disease (care recipient)?

1. Yes
2. No [**Terminate**]

**S4.** Are you the primary caregiver for the care recipient, that is the person providing the greatest number of hours of care (excluding paid caregivers)?

1. Yes
2. No
3. Don't know/ Not sure

**S5.** What is the care recipient's age?

1. Under 18 years old [**Terminate**]
2. 18-34 years old
3. 35-44 years old
4. 45-54 years old
5. 55-64 years old
6. 65-74 years old

7. 75-84 years old
8. 85 years or older
9. Prefer not to answer [**Terminate**]

**S6.** What health conditions does **the care recipient** currently have, if any? *Please indicate all conditions the care recipient has been diagnosed with by a doctor to the best of your knowledge.*

1. Anemia
  - 1.1. Anemia due to chronic kidney disease (CKD)
  - 1.2. Anemia due to cancer
  - 1.3. Anemia due to nutrient deficiency (e.g., iron deficiency, vitamin deficiency)
  - 1.4. Other type of anemia (e.g., hemolytic anemia, aplastic anemia, sickle cell anemia)
  - 1.5. Don't know/ Not sure
2. Cancer [**Terminate**]
3. Cerebrovascular disease (e.g., stroke, transient ischemic attack)
4. Chronic kidney disease (CKD) [**Terminate if not selected**]
5. Chronic respiratory disease (e.g., asthma, chronic lung disease, chronic bronchitis, emphysema)
6. Depression
7. Diabetes
8. Gout
9. Heart disease (e.g., cardiac arrhythmia, congestive heart failure, coronary artery disease, myocardial infarction, peripheral vascular disease [or bypass])
10. High cholesterol
11. Hyperkalemia (high potassium in blood)
12. Hypertension (high blood pressure)
13. Malnutrition
14. Thyroid problems (e.g., hypothyroidism, hyperthyroidism)
15. Other (please specify): \_\_\_\_\_
16. None

**S7.** You indicated that the care recipient has been diagnosed with chronic kidney disease (CKD). Is the care recipient currently undergoing dialysis, on a regular basis? *If so, please select the type of dialysis the care recipient is receiving below.*

1. Yes
  - 1.1. Hemodialysis (in-center)
  - 1.2. Hemodialysis (home)
  - 1.3. Peritoneal dialysis
  - 1.4. Don't know/ Not sure
2. No
3. Don't know/ Not sure [**Terminate**]

**S8.** Has the care recipient undergone a kidney transplant or is he/she on the waitlist for a first kidney transplant?

1. Yes, the care recipient has had at least one kidney transplant [**Terminate**]
2. Yes, the care recipient is on the waitlist to have a first kidney transplant
3. No
4. Don't know/ Not sure [**Terminate**]

|                                                   |
|---------------------------------------------------|
| <b>PART II. CHARACTERISTICS OF CARE RECIPIENT</b> |
|---------------------------------------------------|

**A1.** For how long has the care recipient been diagnosed with CKD? *Please enter the number of years since a doctor first told the care recipient that he/she had CKD, to the best of your knowledge.*

1. Less than a year
2. \_\_\_\_\_ year(s)
3. Don't know/ Not sure

**[ANEMIA CARE RECIPIENTS ONLY]**

**A2.** For how long has the care recipient been diagnosed with anemia? *Please enter the number of years since the care recipient was first told by a doctor that he/she has anemia, to the best of your knowledge.*

1. Less than a year
2. \_\_\_\_\_ year(s)
3. Don't know/ Not sure

**A3.** The care recipient's doctor may have described his/her anemia as mild, moderate, or severe. If so, please indicate his/her anemia severity level.

1. Mild
2. Moderate
3. Severe
4. Don't know/ Not sure

**A4.** Has the care recipient received any treatment(s) to manage his/her **anemia**? Please indicate the treatment(s) he/she currently receives and any treatment(s) he/she may have received in the past. If he/she received more than one treatment, please select all that apply. [Selection boxes]

|                                                                                 | <b>Current anemia treatment(s)</b><br>(i.e., received within the last month) | <b>Former anemia treatment(s)</b><br>(i.e., not received within the last month) |
|---------------------------------------------------------------------------------|------------------------------------------------------------------------------|---------------------------------------------------------------------------------|
| 1. Red blood cell transfusion                                                   |                                                                              |                                                                                 |
| 2. Erythropoietin stimulating agents (ESAs; e.g., Procrit, Retacrit, Aranesp)   |                                                                              |                                                                                 |
| 3. Intravenous iron supplement (e.g., Venofer, Feraheme, Ferrlecit, Injectafer) |                                                                              |                                                                                 |
| 4. Oral iron supplement                                                         |                                                                              |                                                                                 |
| 5. Vitamin B12 supplement                                                       |                                                                              |                                                                                 |
| 6. Folic acid supplement                                                        |                                                                              |                                                                                 |
| 7. Other vitamin supplement (please specify)                                    | _____                                                                        | _____                                                                           |
| 8. Dietary modification                                                         |                                                                              |                                                                                 |
| 9. Other treatment (please specify)                                             | _____                                                                        | _____                                                                           |
| 10. None                                                                        |                                                                              |                                                                                 |

**A5.** If the care recipient were to start a **new anemia treatment**, which type of treatment would be the most convenient for you, assuming the treatment works just as well?

1. Oral (e.g., pill)
  - 1.1. Twice daily
  - 1.2. Once daily
  - 1.3. Three times per week (e.g., Monday, Wednesday, Friday)
  - 1.4. No preference
2. Subcutaneous injection at home (i.e., injection under the skin)
  - 2.1. Three times per week (e.g., Monday, Wednesday, Friday)
  - 2.2. Once weekly
  - 2.3. Once every other week
  - 2.4. Once monthly
  - 2.5. No preference
3. Intravenous injection at a healthcare facility (i.e., injection into a vein)
  - 3.1. Three times per week (e.g., Monday, Wednesday, Friday)
  - 3.2. Once weekly



- 3.3. Once every other week
- 3.4. Once monthly
- 3.5. No preference
4. Intravenous injection at a dialysis facility (i.e., injection into a vein)
  - 4.1. Three times per week (e.g., Monday, Wednesday, Friday)
  - 4.2. Once weekly
  - 4.3. Once every other week
  - 4.4. Once monthly
  - 4.5. No preference
5. I don't have a preference for a type of treatment
  - 5.1. Once daily
  - 5.2. Three times per week (e.g., Monday, Wednesday, Friday)
  - 5.3. Once weekly
  - 5.4. No preference

**[END OF ANEMIA QUESTIONS]**

**A6.** What is the care recipient's gender?

1. Male
2. Female
3. Prefer not to answer

•

**A7.** What is the care recipient's ethnicity/race? *Please select all that apply.*

1. African American or Black
2. Asian or Pacific Islander
3. Native American or Alaskan Native
4. Hispanic or Latino
5. White
6. Other (please specify): \_\_\_\_\_
7. Prefer not to answer

|                             |
|-----------------------------|
| <b>PART III. CAREGIVING</b> |
|-----------------------------|

**B1.** What is your relationship with the care recipient?

*The care recipient is my:*

1. Spouse or partner
2. Parent or step-parent
3. Sibling or step-sibling
4. Child or step-child
5. Aunt, uncle, or other relative
6. Friend or neighbor
7. Other (please specify): \_\_\_\_\_
8. Prefer not to answer

**B2.** For approximately how long have you provided care to the care recipient **due to their CKD?**

1. Less than a year
2. \_\_\_\_\_ year(s)
3. Don't know/ Not sure

**B3.** Where does the care recipient live?

1. In a private home (owner occupied or rented)
  - 1.1. Alone
  - 1.2. With you
  - 1.3. With another family member (including spouse or partner and step-family)
  - 1.4. With a friend or other non-family member
  - 1.5. With a full-time aid
  - 1.6. Other, specify \_\_\_\_\_
2. In a retirement community / independent living group / senior housing complex
3. In a care facility, such as a nursing home or assisted living facility
4. Other (please specify): \_\_\_\_\_
5. Don't know/ Not sure
6. Prefer not to answer

**B4.** During the **past 4 weeks**, on average, how many hours per week did you spend caring for the care recipient? *Please include all time you spent providing companionship, helping the care recipient with daily routine or house chores, assisting with medical needs such as medical visits, driving to and from the care recipient's home, or any other time spent caring for the care recipient.*

1. \_\_\_\_\_ hours per week
2. Don't know/ Not sure
3. Prefer not to answer

**PART IV. HEALTH-RELATED QUALITY OF LIFE**

**C1.** What health conditions do you currently have, if any? *Please indicate all conditions you have (including those not related to caregiving and those that began before you started caregiving), whether or not it has been formally diagnosed by a doctor.*

1. Alzheimer's disease or dementia
2. Anxiety
3. Cancer (including leukemia, lymphoma, metastatic solid tumor)
4. Cerebrovascular disease (e.g., stroke, transient ischemic attack)
5. Chronic fatigue syndrome
6. Chronic respiratory disease (e.g., asthma, chronic lung disease, chronic bronchitis, emphysema)
7. Depression
8. Diabetes
9. Gastrointestinal symptoms (e.g., nausea, vomiting, diarrhea)
10. Headache(s) or migraine(s)
11. Heart disease (e.g., cardiac arrhythmia, congestive heart failure, coronary heart disease, myocardial infarction, peripheral vascular disease or bypass)
12. Hypertension (high blood pressure)
13. Renal (kidney) disease
14. Sleep disturbance(s) or insomnia
15. Substantial weight loss or gain (e.g.,  $\geq 10$  pounds)
16. Other, (please specify): \_\_\_\_\_
17. None
18. Prefer not to answer

**C2.** Below is a list of statements related to how you feel about providing care to the care recipient.

We are asking you for information about your **present** situation. The following statements often refer to the care you provide. This may be any kind of support up to nursing care. *Please select the best description of your present situation.*

| <b>Statement</b>                                                                                                            | <b>Strongly agree</b> | <b>Agree</b> | <b>Disagree</b> | <b>Strongly disagree</b> |
|-----------------------------------------------------------------------------------------------------------------------------|-----------------------|--------------|-----------------|--------------------------|
| 1. My life satisfaction has suffered because of the care.                                                                   |                       |              |                 |                          |
| 2. I often feel physically exhausted.                                                                                       |                       |              |                 |                          |
| 3. From time to time I wish I could "run away" from the situation I am in.                                                  |                       |              |                 |                          |
| 4. Sometimes I don't really feel like "myself" as before.                                                                   |                       |              |                 |                          |
| 5. Since I have been a caregiver my financial situation has decreased.                                                      |                       |              |                 |                          |
| 6. My health is affected by the care situation.                                                                             |                       |              |                 |                          |
| 7. The care takes a lot of my own strength.                                                                                 |                       |              |                 |                          |
| 8. I feel torn between the demands of my environment (such as family) and the demands of the care                           |                       |              |                 |                          |
| 9. I am worried about my future because of the care I give.                                                                 |                       |              |                 |                          |
| 10. My relationships with other family members, relatives, friends and acquaintances are suffering as a result of the care. |                       |              |                 |                          |

**PART V. EMPLOYMENT AND WORK PRODUCTIVITY LOSS**

**D1.** Are you currently employed (working for pay)?

- 1. No
- 2. Yes

**The next questions are about the past 7 days, not including today.**

**D2.** During the **past 7 days**, how many hours did you miss from work because of caregiving? *Include hours you missed on sick days, times you went in late, left early, etc., because of caregiving. Do not include time you missed to participate in this study.*

- 1. \_\_\_\_\_ hours

**D3.** During the **past 7 days**, how many hours did you miss from work because of any other reason, such as vacation, holidays, time off to participate in this study?

- 1. \_\_\_\_\_hours

**D4.** During the **past 7 days**, how many hours did you actually work?

- 1. \_\_\_\_\_hours

**D5.** During the **past 7 days**, how much did caregiving affect your productivity **while you were working**? *Think about days you were limited in the amount or kind of work you could do, days you accomplished less than you would like, or days you could not do your work as carefully as usual. If caregiving affected your work only a little, choose a low number. Choose a high number if caregiving affected your work a great deal.*

Consider only how much caregiving affected

productivity while you were working.

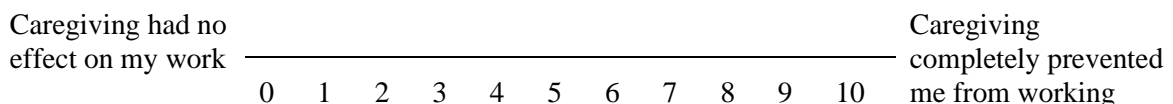

SELECT A NUMBER

**D6.** During the **past 7 days**, how much did caregiving affect your ability to do your regular daily activities, other than work at a job? *By regular activities, we mean the usual activities you do, such as work around the house, shopping, childcare, exercising, studying, etc. Think about times you were limited in the amount or kind of activities you could do and times you accomplished less than you would like. If caregiving affected your activities only a little, choose a low number. Choose a high number if caregiving affected your activities a great deal.*

Consider only how much caregiving affected your ability

to do your regular daily activities, other than work at a job.

|                                                 |                        |                                                                   |
|-------------------------------------------------|------------------------|-------------------------------------------------------------------|
| Caregiving had no effect on my daily activities | _____                  | Caregiving completely prevented me from doing my daily activities |
|                                                 | 0 1 2 3 4 5 6 7 8 9 10 |                                                                   |

SELECT A NUMBER

**D7.** Have you made any of the following job-related decisions **due to caregiving** for the care recipient? *If you have made more than one decision, please select all that apply. If you have increased or decreased the number of hours you work due to caregiving, please indicate by how many hours per week you increased or decreased your workload.*

1. Quit job or employment
2. Retired earlier than planned
3. Changed jobs or employers
4. Declined a job advancement (transfer or promotion)
5. Decreased the number of hours you work per week
  - 5.1. Decreased by \_\_\_\_\_ hours/week
6. Increased the number of hours you work per week
  - 6.1. Increased by \_\_\_\_\_ hours/week
7. Changed the shift you work
8. Taken a leave of absence
9. None
10. Don't know/ Not sure
11. Prefer not to answer

|                                             |
|---------------------------------------------|
| <b>PART VI. DEMOGRAPHIC CHARACTERISTICS</b> |
|---------------------------------------------|

**E1.** What is your gender?

1. Male
2. Female
3. Prefer not to answer

**E2.** What is your ethnicity/race? *Please select all that apply.*

1. African American or Black
2. Asian or Pacific Islander

3. Native American or Alaskan Native
4. Hispanic or Latino
5. White
6. Other (please specify): \_\_\_\_\_
7. Prefer not to answer

**E3.** Please select your state of residence from the list below.

**Table S1.** ESA characteristics<sup>1</sup>

|                                                                                         | Anemia Cohort           | Dialysis dependent       | Non-dialysis dependent |
|-----------------------------------------------------------------------------------------|-------------------------|--------------------------|------------------------|
| <b>Number of patients receiving ESAs, N</b>                                             | <b>N = 54</b>           | <b>N=42</b>              | <b>N=12</b>            |
| <b>Type and frequency of ESA treatment, n (%)</b>                                       |                         |                          |                        |
| <b>Injection at home</b>                                                                | <b>11 (20.4%)</b>       | <b>8 (19.0%)</b>         | <b>3 (25.0%)</b>       |
| Three times per week                                                                    | 3 (27.3%)               | 2 (25.0%)                | 1 (33.3%)              |
| Once weekly                                                                             | 2 (18.2%)               | 2 (25.0%)                | 0 (0.0%)               |
| Once every other week                                                                   | 5 (45.5%)               | 3 (37.5%)                | 2 (66.7%)              |
| Once monthly                                                                            | 1 (9.1%)                | 1 (12.5%)                | 0 (0.0%)               |
| Unknown                                                                                 | 0 (0.0%)                | 0 (0.0%)                 | 0 (0.0%)               |
| <b>Intravenous injection at a healthcare facility or dialysis center</b>                | <b>43 (79.6%)</b>       | <b>34 (81.0%)</b>        | <b>9 (75.0%)</b>       |
| Three times per week                                                                    | 4 (9.3%)                | 4 (11.8%)                | 0 (0.0%)               |
| Once weekly                                                                             | 8 (18.6%)               | 7 (20.6%)                | 1 (11.1%)              |
| Once every other week                                                                   | 11 (25.6%)              | 8 (23.5%)                | 3 (33.3%)              |
| Once monthly                                                                            | 12 (27.9%)              | 7 (20.6%)                | 5 (55.6%)              |
| Unknown                                                                                 | 8 (18.6%)               | 8 (23.5%)                | 0 (0.0%)               |
| <b>ESA injection at home</b>                                                            |                         |                          |                        |
| <b>Duration of ESA treatment (minutes),<sup>2</sup> mean ± SD [median]</b>              | <b>9.5 ± 17.8 [5.0]</b> | <b>11.1 ± 19.8 [5.0]</b> | <b>3.0 ± 2.8 [3.0]</b> |
| Unknown                                                                                 | 1 (9.1%)                | 0 (0.0%)                 | 1 (33.3%)              |
| <b>Help from a family member or friend to administer ESA at home<sup>2</sup>, n (%)</b> |                         |                          |                        |
| Always (100% of the time)                                                               | 4 (36.4%)               | 4 (50.0%)                | 0 (0.0%)               |
| Usually (~80% of the time)                                                              | 2 (18.2%)               | 1 (12.5%)                | 1 (33.3%)              |
| Often (~60% of the time)                                                                | 0 (0.0%)                | 0 (0.0%)                 | 0 (0.0%)               |
| Sometimes (~40% of the time)                                                            | 0 (0.0%)                | 0 (0.0%)                 | 0 (0.0%)               |
| Rarely (<20% of the time)                                                               | 1 (9.1%)                | 1 (12.5%)                | 0 (0.0%)               |
| Never (0% of the time)                                                                  | 4 (36.4%)               | 2 (25.0%)                | 2 (66.7%)              |
| <b>ESA intravenous injection at healthcare facility or dialysis center</b>              |                         |                          |                        |
| <b>Duration of ESA treatment (hours)<sup>3,4</sup>, mean ± SD [median]</b>              | <b>2.0 ± 1.8 [1.5]</b>  | <b>2.3 ± 2.0 [1.4]</b>   | <b>1.4 ± 0.5 [1.5]</b> |
| Unknown                                                                                 | 13 (30.2%)              | 12 (35.3%)               | 1 (11.1%)              |
| <b>Family member or friend accompanying at ESA treatment visit<sup>4</sup>, n (%)</b>   |                         |                          |                        |
| Always (100% of the time)                                                               | 7 (16.3%)               | 3 (8.8%)                 | 4 (44.4%)              |
| Usually (~80% of the time)                                                              | 2 (4.7%)                | 2 (5.9%)                 | 0 (0.0%)               |
| Often (~60% of the time)                                                                | 1 (2.3%)                | 1 (2.9%)                 | 0 (0.0%)               |
| Sometimes (~40% of the time)                                                            | 0 (0.0%)                | 0 (0.0%)                 | 0 (0.0%)               |
| Rarely (<20% of the time)                                                               | 5 (11.6%)               | 4 (11.8%)                | 1 (11.1%)              |
| Never (0% of the time)                                                                  | 28 (65.1%)              | 24 (70.6%)               | 4 (44.4%)              |

**Abbreviations:** ESA: erythropoiesis stimulating agent, SD: standard deviation

**Notes:**



1. Characteristics were measured at the time of data collection for patients who indicated being diagnosed with anemia and currently treated with an ESA.
2. Evaluated among patients who indicated currently receiving ESA treatment at home (N=11).
3. Duration of ESA treatment at a healthcare facility or dialysis center was defined as from the moment a patient leaves their residence to the moment they return, including all time for transportation, wait, and treatment by the healthcare provider.
4. Evaluated among patients who indicated currently receiving ESA treatment at a healthcare facility or dialysis center (N=43).

**Table S2.** Care received by patients<sup>1</sup>

|                                                                                  | Anemia Cohort            | Anemia-free Cohort       |
|----------------------------------------------------------------------------------|--------------------------|--------------------------|
| <b>Number of patients, N</b>                                                     | N = 190                  | N = 220                  |
| <b>Number of hours of care received per week<sup>2</sup>, mean ± SD [median]</b> | <b>14.2 ± 26.3 [4.0]</b> | <b>11.3 ± 24.2 [2.0]</b> |
| <b>Number of care-partners, n (%)</b>                                            |                          |                          |
| 0                                                                                | 70 (36.8%)               | 99 (45.0%)               |
| 1                                                                                | 48 (25.3%)               | 52 (23.6%)               |
| 2                                                                                | 33 (17.4%)               | 28 (12.7%)               |
| 3+                                                                               | 31 (16.3%)               | 32 (14.5%)               |
| Unknown                                                                          | 8 (4.2%)                 | 8 (3.7%)                 |
| <b>Relationship to care-partners<sup>3</sup>, n (%)</b>                          |                          |                          |
| Spouse or partner                                                                | 67 (35.3%)               | 86 (39.1%)               |
| Parent or step-parent                                                            | 17 (8.9%)                | 13 (5.9%)                |
| Sibling or step-sibling                                                          | 11 (5.8%)                | 10 (4.5%)                |
| Child or step-child                                                              | 37 (19.5%)               | 41 (18.6%)               |
| Aunt, uncle, or other relative                                                   | 6 (3.2%)                 | 8 (3.6%)                 |
| Friend or neighbor                                                               | 25 (13.2%)               | 16 (7.3%)                |
| Paid home care service or nurse                                                  | 16 (8.4%)                | 14 (6.4%)                |
| Other                                                                            | 5 (2.6%)                 | 3 (1.4%)                 |

**Abbreviations:** SD: standard deviation

**Notes:**

1. Care received was measured at the time of data collection, based on recollection from the past 4 weeks.
2. Care includes both paid and unpaid care.
3. Patients could select more than one option (not mutually exclusive).

**Table S3.** Care received, anemia-related characteristics, HRQoL, and employment and work productivity among patients stratified by dialysis status<sup>1</sup>

|                                                               | Dialysis dependent |                    | Non-dialysis dependent |                    |
|---------------------------------------------------------------|--------------------|--------------------|------------------------|--------------------|
|                                                               | Anemia Cohort      | Anemia-free Cohort | Anemia Cohort          | Anemia-free Cohort |
| Number of patients, N                                         | N = 80             | N = 110            | N = 110                | N = 110            |
| <b>Care received<sup>2</sup></b>                              |                    |                    |                        |                    |
| Number of hours of care received per week, mean ± SD [median] | 20.0 ± 34.0 [8.5]  | 15.9 ± 28.7 [5.0]  | 10.0 ± 18.0 [3.0]      | 6.7 ± 17.5 [0.0]   |
| <b>Number of care-partners, n (%)</b>                         |                    |                    |                        |                    |
| 0                                                             | 22 (27.5%)         | 33 (30.0%)         | 48 (43.6%)             | 66 (60.0%)         |
| 1                                                             | 20 (25.0%)         | 32 (29.1%)         | 28 (25.5%)             | 20 (18.2%)         |
| 2                                                             | 21 (26.3%)         | 16 (14.5%)         | 12 (10.9%)             | 12 (10.9%)         |
| 3+                                                            | 13 (16.3%)         | 24 (21.8%)         | 18 (16.4%)             | 8 (7.3%)           |
| Unknown                                                       | 4 (5.0%)           | 5 (4.5%)           | 4 (3.6%)               | 3 (2.8%)           |
| <b>Relationship to care-partners<sup>3</sup>, n (%)</b>       |                    |                    |                        |                    |
| Spouse or partner                                             | 33 (41.3%)         | 55 (50.0%)         | 34 (30.9%)             | 31 (28.2%)         |
| Parent or step-parent                                         | 9 (11.3%)          | 11 (10.0%)         | 8 (7.3%)               | 2 (1.8%)           |
| Sibling or step-sibling                                       | 5 (6.3%)           | 7 (6.4%)           | 6 (5.5%)               | 3 (2.7%)           |
| Child or step-child                                           | 20 (25.0%)         | 28 (25.5%)         | 17 (15.5%)             | 13 (11.8%)         |
| Aunt, uncle, or other relative                                | 1 (1.3%)           | 7 (6.4%)           | 5 (4.5%)               | 1 (0.9%)           |
| Friend or neighbor                                            | 12 (15.0%)         | 7 (6.4%)           | 13 (11.8%)             | 9 (8.2%)           |
| Paid home care service or nurse                               | 10 (12.5%)         | 12 (10.9%)         | 6 (5.5%)               | 2 (1.8%)           |
| Other <sup>4</sup>                                            | 1 (1.3%)           | 0 (0.0%)           | 4 (3.6%)               | 3 (2.7%)           |
| Did not receive any help                                      | 22 (27.5%)         | 33 (30.0%)         | 48 (43.6%)             | 66 (60.0%)         |
| <b>Anemia-related characteristics<sup>5</sup></b>             |                    |                    |                        |                    |
| <b>Preferred route of administration<sup>6</sup></b>          |                    |                    |                        |                    |
| <b>Oral</b>                                                   | <b>32 (40.0%)</b>  | –                  | <b>51 (46.4%)</b>      | –                  |
| Twice daily                                                   | 9 (28.1%)          | –                  | 0 (0.0%)               | –                  |
| Once daily                                                    | 10 (31.3%)         | –                  | 32 (61.5%)             | –                  |
| Three times per week                                          | 6 (18.8%)          | –                  | 5 (4.6%)               | –                  |
| No preference                                                 | 7 (21.9%)          | –                  | 14 (26.9%)             | –                  |
| <b>Subcutaneous injection at home</b>                         | <b>7 (8.8%)</b>    | –                  | <b>7 (6.4%)</b>        | –                  |
| Three times per week                                          | 4 (57.1%)          | –                  | 0 (0.0%)               | –                  |

|                                                                 |                             |                             |                             |                             |
|-----------------------------------------------------------------|-----------------------------|-----------------------------|-----------------------------|-----------------------------|
| Once weekly                                                     | 2 (28.6%)                   | –                           | 5 (71.4%)                   | –                           |
| Once every other week                                           | 0 (0.0%)                    | –                           | 1 (14.3%)                   | –                           |
| Once monthly                                                    | 0 (0.0%)                    | –                           | 1 (14.3%)                   | –                           |
| No preference                                                   | 1 (14.3%)                   | –                           | 0 (0.0%)                    | –                           |
| <b>Intravenous injection at a healthcare facility</b>           | <b>7 (8.8%)</b>             | –                           | <b>8 (7.3%)</b>             | –                           |
| Three times per week                                            | 1 (14.3%)                   | –                           | 1 (12.5%)                   | –                           |
| Once weekly                                                     | 2 (28.6%)                   | –                           | 3 (37.5%)                   | –                           |
| Once every other week                                           | 1 (14.3%)                   | –                           | 1 (12.5%)                   | –                           |
| Once monthly                                                    | 3 (42.9%)                   | –                           | 3 (37.5%)                   | –                           |
| No preference                                                   | 0 (0.0%)                    | –                           | 0 (0.0%)                    | –                           |
| <b>Intravenous injection at a dialysis facility<sup>7</sup></b> | <b>14 (17.5%)</b>           | –                           | <b>0 (0.0%)</b>             | –                           |
| Three times per week                                            | 3 (21.4%)                   | –                           | –                           | –                           |
| Once weekly                                                     | 4 (28.6%)                   | –                           | –                           | –                           |
| Once every other week                                           | 1 (7.1%)                    | –                           | –                           | –                           |
| Once monthly                                                    | 2 (14.3%)                   | –                           | –                           | –                           |
| No preference                                                   | 4 (28.6%)                   | –                           | –                           | –                           |
| <b>No preference for a type of treatment</b>                    | <b>17 (21.3%)</b>           | –                           | <b>21 (19.1%)</b>           | –                           |
| No preference for a specific schedule                           | 0 (0.0%)                    | –                           | 1 (4.8%)                    | –                           |
| Once daily                                                      | 0 (0.0%)                    | –                           | 0 (0.0%)                    | –                           |
| Three times per week                                            | 7 (41.2%)                   | –                           | 9 (42.9%)                   | –                           |
| Once weekly                                                     | 10 (58.8%)                  | –                           | 11 (52.4%)                  | –                           |
| <b>HRQoL</b>                                                    |                             |                             |                             |                             |
| <b>FACT-An score<sup>8</sup>, mean ± SD [median]</b>            | <b>108.4 ± 31.7 [108.0]</b> | <b>114.4 ± 37.0 [112.5]</b> | <b>111.3 ± 33.0 [109.8]</b> | <b>128.7 ± 30.8 [134.5]</b> |
| <b>FACT-G score</b>                                             | <b>64.5 ± 18.6 [65.5]</b>   | <b>68.4 ± 21.0 [69.0]</b>   | <b>66.8 ± 18.8 [66.5]</b>   | <b>73.6 ± 17.9 [76.0]</b>   |
| Physical well-being                                             | 16.9 ± 6.3 [17.0]           | 17.2 ± 7.2 [18.5]           | 19.0 ± 5.9 [20.0]           | 22.4 ± 5.2 [24.0]           |
| Social/family well-being                                        | 17.9 ± 6.4 [19.0]           | 19.6 ± 6.6 [21.0]           | 17.4 ± 7.2 [17.5]           | 17.6 ± 6.8 [18.5]           |
| Emotional well-being                                            | 15.9 ± 6.5 [18.0]           | 15.9 ± 6.1 [17.0]           | 15.9 ± 5.3 [17.0]           | 15.5 ± 4.7 [16.0]           |
| Functional well-being                                           | 13.7 ± 6.1 [14.0]           | 15.6 ± 6.8 [16.0]           | 14.5 ± 6.3 [14.0]           | 18.1 ± 5.7 [19.0]           |
| <b>Anemia score</b>                                             | <b>44.0 ± 15.7 [42.5]</b>   | <b>46.1 ± 17.9 [45.0]</b>   | <b>44.5 ± 16.1 [43.5]</b>   | <b>55.1 ± 15.2 [56.5]</b>   |
| <b>Employment and Work Productivity</b>                         |                             |                             |                             |                             |
| <b>Currently employed, n (%)</b>                                | <b>29 (36.3%)</b>           | <b>31 (28.2%)</b>           | <b>26 (23.6%)</b>           | <b>47 (42.7%)</b>           |
| <b>WPAI-SHP<sup>9</sup>, % ± SD [median]</b>                    |                             |                             |                             |                             |
| Activity impairment due to health                               | 56.3 ± 27.8 [60.0]          | 50.4 ± 30.5 [50.0]          | 48.8 ± 28.1 [50.0]          | 28.0 ± 28.0 [20.0]          |
| Overall work impairment due to health                           | 55.7 ± 32.1 [61.8]          | 59.8 ± 28.9 [60.0]          | 33.2 ± 29.9 [24.6]          | 21.4 ± 26.4 [10.0]          |
| Work time missed due to health (absenteeism)                    | 21.1 ± 29.2 [7.7]           | 27.8 ± 28.3 [21.1]          | 7.8 ± 12.7 [0.0]            | 5.5 ± 18.6 [0.0]            |
| Impairment while working due to health (presenteeism)           | 45.8 ± 30.9 [40.0]          | 48.5 ± 26.8 [50.0]          | 30.0 ± 27.5 [20.0]          | 17.8 ± 21.4 [10.0]          |

| <b>Had at least one job-related decision due to health, n (%)</b> | <b>61 (76.3%)</b> | <b>66 (60.0%)</b> | <b>39 (35.5%)</b> | <b>40 (36.4%)</b> |
|-------------------------------------------------------------------|-------------------|-------------------|-------------------|-------------------|
| <b>Job-related decisions due to health<sup>3</sup>, n (%)</b>     |                   |                   |                   |                   |
| Retired earlier than planned                                      | 22 (27.5%)        | 33 (30.0%)        | 17 (15.5%)        | 17 (15.5%)        |
| Decreased the number of hours worked per week                     | 24 (30.0%)        | 17 (15.5%)        | 14 (12.7%)        | 14 (12.7%)        |
| Quit job or employment                                            | 25 (31.3%)        | 28 (25.5%)        | 12 (10.9%)        | 7 (6.4%)          |
| Took a leave of absence                                           | 11 (13.8%)        | 15 (13.6%)        | 8 (7.3%)          | 3 (2.7%)          |
| Changed jobs or employers                                         | 11 (13.8%)        | 11 (10.0%)        | 6 (5.5%)          | 7 (6.4%)          |
| Declined a job advancement (transfer or promotion)                | 8 (10.0%)         | 8 (7.3%)          | 3 (2.7%)          | 3 (2.7%)          |
| Changed shift                                                     | 5 (6.3%)          | 9 (8.2%)          | 4 (3.6%)          | 2 (1.8%)          |
| Increased the number of hours worked per week                     | 0 (0.0%)          | 4 (3.6%)          | 0 (0.0%)          | 1 (0.9%)          |
| None                                                              | 18 (22.5%)        | 44 (40.0%)        | 67 (60.9%)        | 64 (58.2%)        |
| Unknown                                                           | 1 (1.3%)          | 0 (0.0%)          | 4 (3.6%)          | 6 (5.5%)          |

**Abbreviations:** FACT - An: functional assessment of cancer therapy - Anemia; FACT-G: functional assessment of cancer therapy - general; HRQoL: health-related quality of life; SD: standard deviation; WPAI-SHP: work productivity and activity impairment - specific health problem

**Notes:**

1. Outcomes were measured at the time of data collection.
2. Care received includes paid and unpaid care based on recollection from the past 4 weeks at the time of data collection.
3. Patients could select more than one option (not mutually exclusive).
4. Patients reported receiving help from other individuals: paid professional (non-healthcare) (n=6), former spouse/partner (n=1).
5. Anemia-related characteristics were measured for respondents who indicated having anemia.
6. Preferred frequency of administration was asked only to the subset of patients who indicated the particular route of administration was preferred.
7. Intravenous injection at a dialysis facility was displayed only to patients who indicated receiving dialysis (N=80).
8. The FACT-An questionnaire considers HRQoL during the past 7 days at the time of data collection. The FACT-An score is the sum of the FACT-G score and the anemia subscale score. The total FACT-G score is the sum of the physical well-being, social/family well-being, emotional well-being, and functional well-being subscores. For physical well-being, social/family well-being, and functional well-being subscales, scores can range from 0 to 28. For emotional well-being subscale, scores can range from 0 to 24. For anemia subscale, scores can range from 0 to 80. For FACT-G, scores can range from 0 to 108 and for FACT-An, 0 to 188. For all scales, a higher score indicates higher QoL.
9. The WPAI-SHP considers impairment during the past 7 days at the time of data collection. Outcomes are expressed as impairment percentages, with higher numbers indicating greater impairment and less productivity. Activity impairment refers to the impact of health problems on the ability to complete daily activities and was measured among all patients. Overall work impairment, presenteeism, and absenteeism refer to the impact of health problems on the ability to work and were measured among employed patients.

**Table S4.** Care provided, anemia-related characteristics, HRQoL, and employment and work productivity among care-partners stratified by dialysis status<sup>1</sup>

|                                                                                                               | Dialysis dependent        |                           | Non-dialysis dependent    |                           |
|---------------------------------------------------------------------------------------------------------------|---------------------------|---------------------------|---------------------------|---------------------------|
|                                                                                                               | Anemia Cohort             | Anemia-free Cohort        | Anemia Cohort             | Anemia-free Cohort        |
| <b>Number of care-partners, N</b>                                                                             | <b>N = 68</b>             | <b>N = 80</b>             | <b>N = 42</b>             | <b>N = 68</b>             |
| <b>Caregiving characteristics</b>                                                                             |                           |                           |                           |                           |
| <b>Care-partner lives with the care recipient, n (%)</b>                                                      | <b>32 (47.1%)</b>         | <b>45 (56.3%)</b>         | <b>24 (57.1%)</b>         | <b>45 (66.2%)</b>         |
| <b>Number of hours per week spent caring for the care recipient (overall)<sup>2</sup>, mean ± SD [median]</b> | <b>31.8 ± 35.0 [24.0]</b> | <b>41.0 ± 42.6 [25.0]</b> | <b>36.7 ± 37.3 [20.0]</b> | <b>34.8 ± 38.9 [20.0]</b> |
| <i>Number of hours per week spent caring if living with the care recipient</i>                                | <i>54.0 ± 41.5 [40.0]</i> | <i>47.8 ± 43.1 [30.0]</i> | <i>50.7 ± 45.0 [52.0]</i> | <i>37.4 ± 39.9 [24.0]</i> |
| <b>Anemia-related characteristics<sup>3</sup></b>                                                             |                           |                           |                           |                           |
| <b>Preferred route of administration<sup>4</sup></b>                                                          |                           |                           |                           |                           |
| <b>Oral</b>                                                                                                   | <b>26 (38.2%)</b>         | –                         | <b>25 (59.5%)</b>         | –                         |
| Twice daily                                                                                                   | 8 (30.8%)                 | –                         | 2 (8.0%)                  | –                         |
| Once daily                                                                                                    | 11 (42.3%)                | –                         | 10 (40.0%)                | –                         |
| Three times per week                                                                                          | 1 (3.8%)                  | –                         | 5 (20.0%)                 | –                         |
| No preference                                                                                                 | 6 (23.1%)                 | –                         | 8 (32.0%)                 | –                         |
| <b>Subcutaneous injection at home</b>                                                                         | <b>20 (29.4%)</b>         | –                         | <b>7 (16.7%)</b>          | –                         |
| Three times per week                                                                                          | 4 (20.0%)                 | –                         | 2 (28.6%)                 | –                         |
| Once weekly                                                                                                   | 12 (60.0%)                | –                         | 4 (57.1%)                 | –                         |
| Once every other week                                                                                         | 2 (10.0%)                 | –                         | 0 (0.0%)                  | –                         |
| Once monthly                                                                                                  | 0 (0.0%)                  | –                         | 1 (14.3%)                 | –                         |
| No preference                                                                                                 | 2 (10.0%)                 | –                         | 0 (0.0%)                  | –                         |
| <b>Intravenous injection at a healthcare facility</b>                                                         | <b>4 (5.9%)</b>           | –                         | <b>2 (4.8%)</b>           | –                         |
| Three times per week                                                                                          | 0 (0.0%)                  | –                         | 0 (0.0%)                  | –                         |
| Once weekly                                                                                                   | 1 (25.0%)                 | –                         | 0 (0.0%)                  | –                         |
| Once every other week                                                                                         | 2 (50.0%)                 | –                         | 1 (50.0%)                 | –                         |
| Once monthly                                                                                                  | 1 (25.0%)                 | –                         | 0 (0.0%)                  | –                         |
| No preference                                                                                                 | 0 (0.0%)                  | –                         | 1 (50.0%)                 | –                         |
| <b>Intravenous injection at a dialysis facility<sup>5</sup></b>                                               | <b>9 (13.2%)</b>          | –                         | <b>0 (0.0%)</b>           | –                         |
| Three times per week                                                                                          | 4 (44.4%)                 | –                         | –                         | –                         |
| Once weekly                                                                                                   | 3 (33.3%)                 | –                         | –                         | –                         |

|                                                                       |                          |                          |                          |                          |
|-----------------------------------------------------------------------|--------------------------|--------------------------|--------------------------|--------------------------|
| Once every other week                                                 | 0 (0.0%)                 | –                        | –                        | –                        |
| Once monthly                                                          | 2 (22.2%)                | –                        | –                        | –                        |
| No preference                                                         | 0 (0.0%)                 | –                        | –                        | –                        |
| <b>No preference for a type of treatment</b>                          | <b>9 (13.2%)</b>         | –                        | <b>8 (19.0%)</b>         | –                        |
| No preference for a specific schedule                                 | 5 (55.6%)                | –                        | 6 (75.0%)                | –                        |
| Once daily                                                            | 2 (22.2%)                | –                        | 0 (0.0%)                 | –                        |
| Three times per week                                                  | 1 (11.1%)                | –                        | 0 (0.0%)                 | –                        |
| Once weekly                                                           | 1 (11.1%)                | –                        | 2 (25.0%)                | –                        |
| <b>HRQoL</b>                                                          |                          |                          |                          |                          |
| <b>BSFC-s score (overall)<sup>6</sup>, mean ± SD [median]</b>         | <b>17.3 ± 6.5 [18.0]</b> | <b>16.3 ± 6.0 [16.0]</b> | <b>15.4 ± 7.5 [15.5]</b> | <b>14.4 ± 7.2 [14.0]</b> |
| Low burden, n (%)                                                     | 2 (2.9%)                 | 3 (3.8%)                 | 4 (9.5%)                 | 8 (11.8%)                |
| Moderate burden, n (%)                                                | 16 (23.5%)               | 23 (28.8%)               | 12 (28.6%)               | 27 (39.7%)               |
| Severe to very severe burden, n (%)                                   | 50 (73.5%)               | 54 (67.5%)               | 26 (61.9%)               | 33 (48.5%)               |
| <b>Care-partners living with the care recipient</b>                   |                          |                          |                          |                          |
| <b>BSFC-s score<sup>3</sup>, mean ± SD [median]</b>                   | <b>17.9 ± 6.2 [18.0]</b> | <b>16.4 ± 5.9 [17.0]</b> | <b>16.1 ± 7.3 [16.0]</b> | <b>14.5 ± 7.1 [14.5]</b> |
| Low burden, n (%)                                                     | 1 (3.1%)                 | 2 (4.4%)                 | 2 (8.7%)                 | 6 (14.3%)                |
| Moderate burden, n (%)                                                | 6 (18.8%)                | 13 (28.9%)               | 4 (17.4%)                | 15 (35.7%)               |
| Severe to very severe burden, n (%)                                   | 25 (78.1%)               | 30 (66.7%)               | 17 (73.9%)               | 21 (50.0%)               |
| <b>Employment and Work Productivity</b>                               |                          |                          |                          |                          |
| <b>Currently employed, n (%)</b>                                      | <b>45 (66.2%)</b>        | <b>42 (52.5%)</b>        | <b>22 (52.4%)</b>        | <b>32 (47.1%)</b>        |
| <b>WPAI-CG (overall)<sup>7</sup>, % ± SD [median]</b>                 |                          |                          |                          |                          |
| Activity impairment due to caregiving                                 | 54.0 ± 28.9 [60.0]       | 46.0 ± 27.0 [50.0]       | 41.0 ± 26.9 [45.0]       | 39.3 ± 28.9 [40.0]       |
| Overall work impairment due to caregiving                             | 54.7 ± 27.1 [55.6]       | 42.0 ± 28.5 [38.6]       | 32.8 ± 25.7 [30.0]       | 38.8 ± 33.1 [40.0]       |
| Work time missed due to caregiving (absenteeism)                      | 26.3 ± 27.4 [17.7]       | 16.0 ± 24.2 [8.1]        | 2.9 ± 5.7 [0.0]          | 13.2 ± 22.9 [0.0]        |
| Impairment while working due to caregiving (presenteeism)             | 41.0 ± 25.7 [50.0]       | 33.4 ± 25.3 [30.0]       | 31.5 ± 25.0 [30.0]       | 33.0 ± 28.2 [35.0]       |
| <b>Had at least one job-related decision due to caregiving, n (%)</b> | <b>54 (79.4%)</b>        | <b>52 (65.0%)</b>        | <b>22 (52.4%)</b>        | <b>27 (39.7%)</b>        |
| <b>Job-related decisions due to caregiving<sup>8</sup>, n (%)</b>     |                          |                          |                          |                          |
| Retired earlier than planned                                          | 7 (10.3%)                | 10 (12.5%)               | 2 (4.8%)                 | 8 (11.8%)                |
| Decreased the number of hours worked per week                         | 24 (35.3%)               | 18 (22.5%)               | 11 (26.2%)               | 8 (11.8%)                |
| Quit job or employment                                                | 12 (17.6%)               | 12 (15.0%)               | 6 (14.3%)                | 5 (7.4%)                 |
| Took a leave of absence                                               | 22 (32.4%)               | 7 (8.8%)                 | 1 (2.4%)                 | 3 (4.4%)                 |
| Changed jobs or employers                                             | 15 (22.1%)               | 10 (12.5%)               | 6 (14.3%)                | 4 (5.9%)                 |
| Declined a job advancement (transfer or promotion)                    | 11 (16.2%)               | 10 (12.5%)               | 2 (4.8%)                 | 2 (2.9%)                 |
| Changed shift                                                         | 18 (26.5%)               | 13 (16.3%)               | 3 (7.1%)                 | 4 (5.9%)                 |
| Increased the number of hours worked per week                         | 4 (5.9%)                 | 4 (5.0%)                 | 4 (9.5%)                 | 1 (1.5%)                 |
| None                                                                  | 14 (20.6%)               | 27 (33.8%)               | 19 (45.2%)               | 38 (55.9%)               |
| Unknown                                                               | 0 (0.0%)                 | 1 (1.3%)                 | 1 (2.4%)                 | 3 (4.4%)                 |

**Abbreviations:** BSFC-s: burden scale for family caregivers - short version; HRQoL: health-related quality of life; SD: standard deviation; WPAI-CG: work productivity and activity impairment - caregiver

**Notes:**

1. Outcomes were measured at the time of data collection.
2. Measured at the time of data collection, based on recollection from the past 4 weeks.
3. Anemia-related characteristics were measured for respondents who indicated having anemia.
4. Preferred frequency of administration was asked only to the subset of care-partners who indicated the particular route of administration was preferred.
5. Intravenous injection at a dialysis facility was displayed only to care-partners who indicated providing care to a care recipient receiving dialysis (N=68).
6. BSFC-s score ranges from 0 to 30 points and higher scores indicate greater care-partner burden. Scores ranging from 0 to 4 indicate a degree of subjective burden ranging from none to low, with no increased risk of physical psychosomatic complaints. Scores ranging from 5 to 14 indicate a moderate degree of subjective burden, with an increased risk of physical psychosomatic complaints. Scores ranging from 15 to 30 indicate a severe to very severe degree of subjective burden and a very much increased risk of physical psychosomatic complaints.
7. The WPAI-CG considers impairment during the past 7 days at the time of data collection. Outcomes are expressed as impairment percentages, with higher numbers indicating greater impairment and less productivity. Activity impairment refers to the impact of caregiving on the ability to complete daily activities and was measured among all care-partners. Overall work impairment, presenteeism, and absenteeism refer to the impact of caregiving on the ability to work and were measured among employed care-partners.
8. Care-partners could select more than one option (not mutually exclusive).
